# Supplementary material
Source: PubMed Central journal article supplement (PMC5926907)
Supplement: jciinsight-3-98738-s001.pdf [file jciinsight-3-98738-s001.pdf]

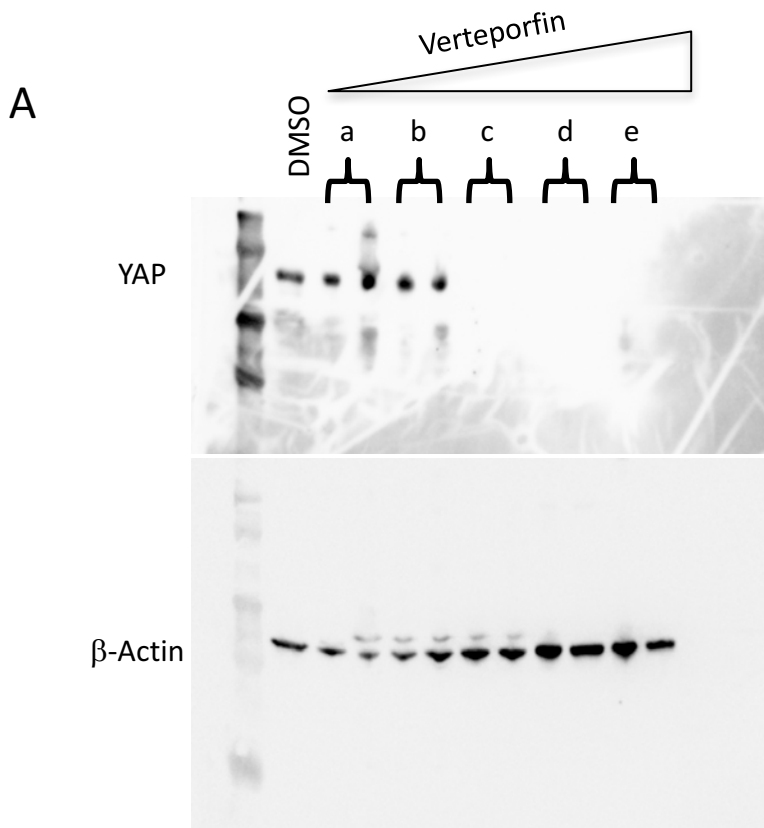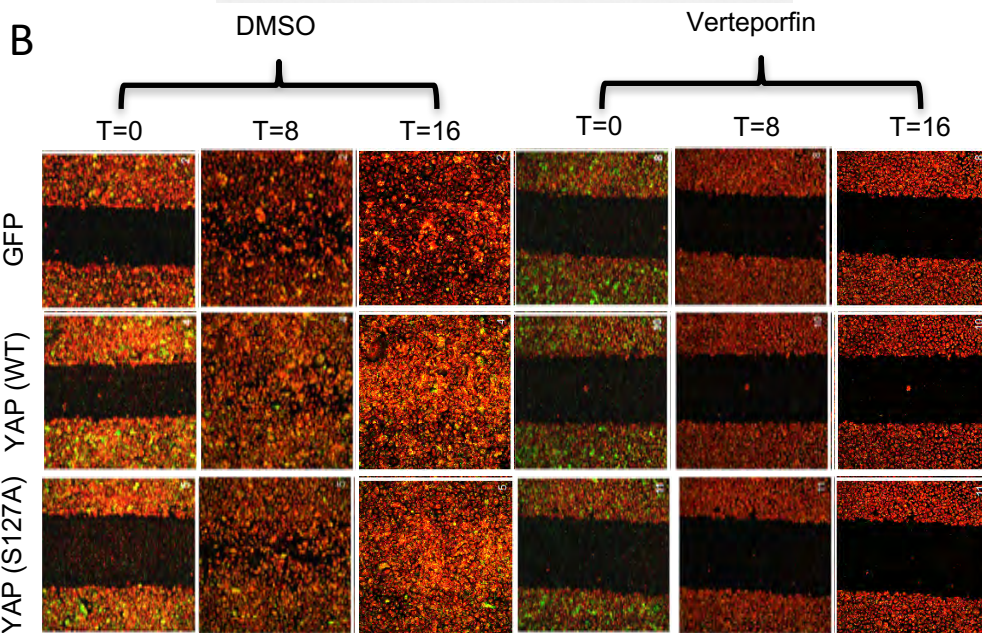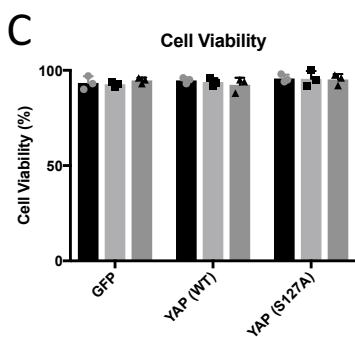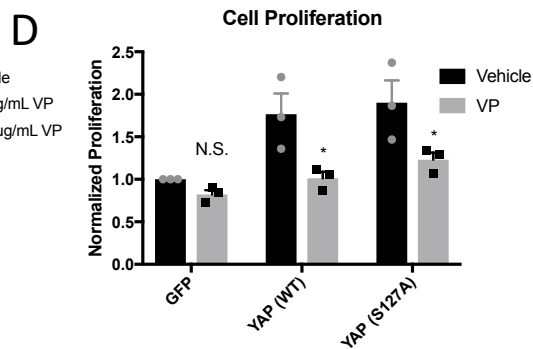

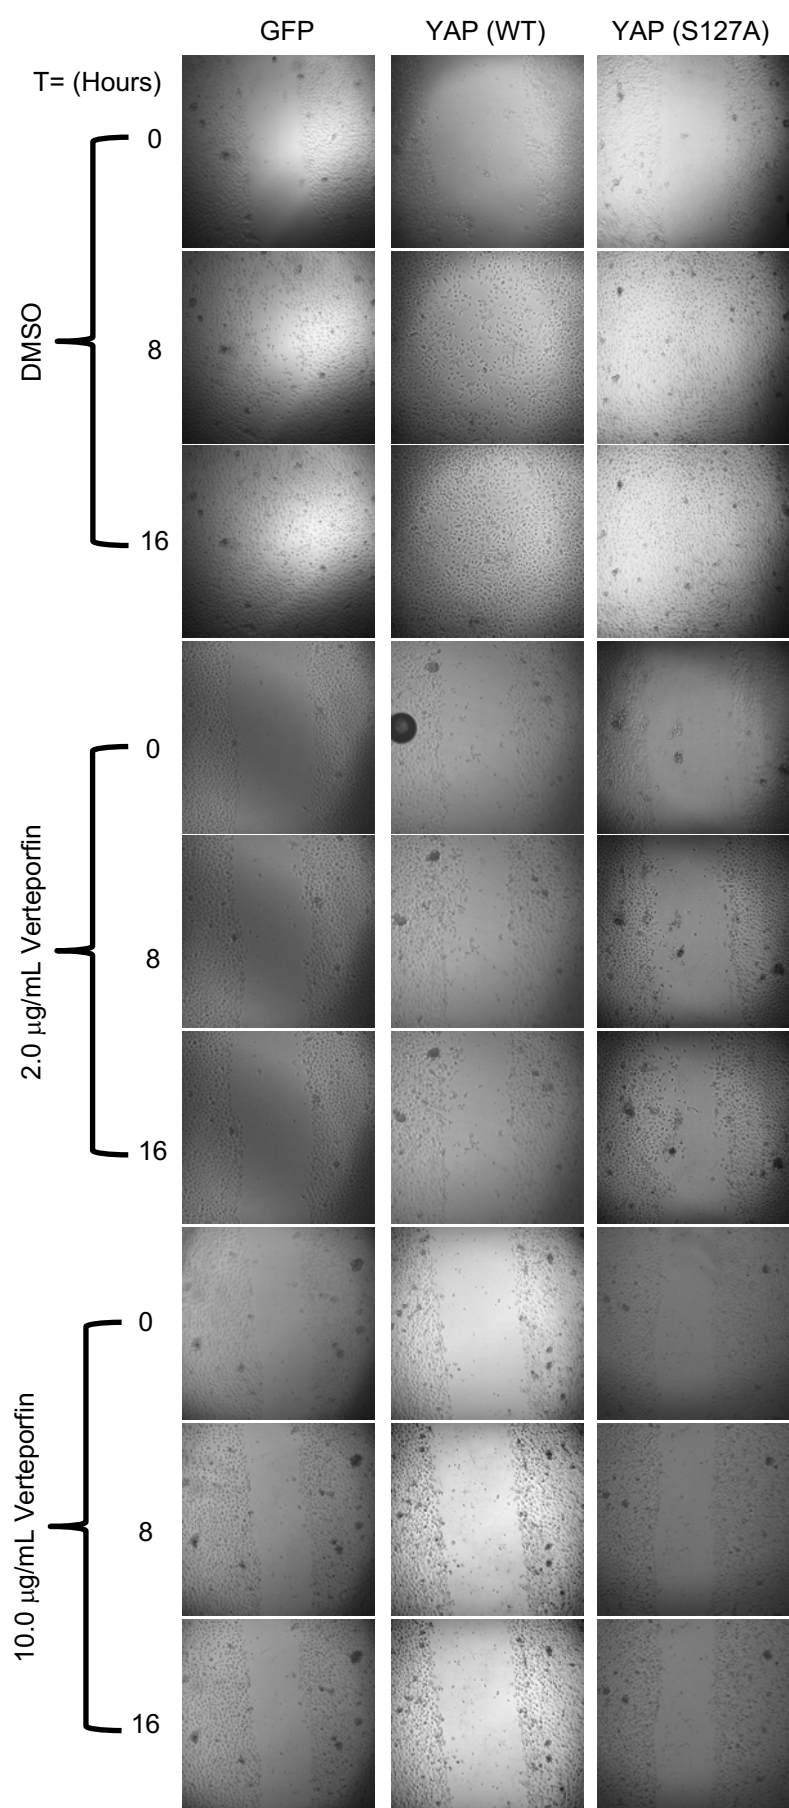

Supplemental Figure S3:

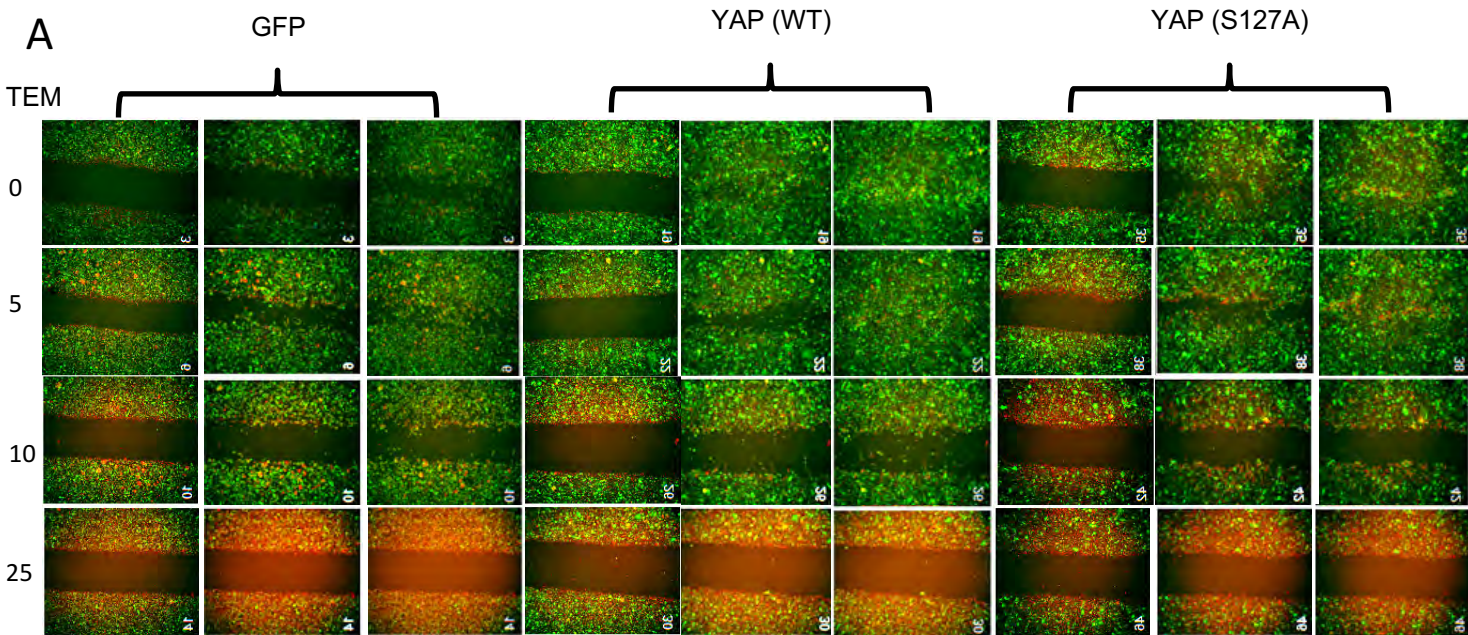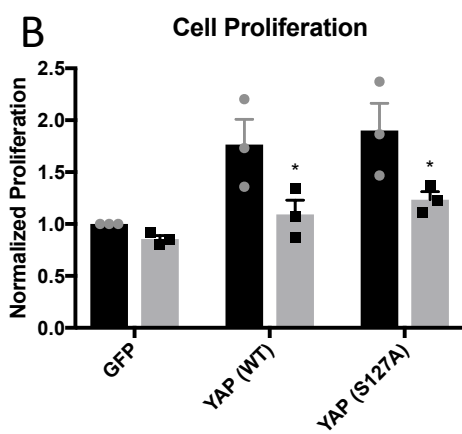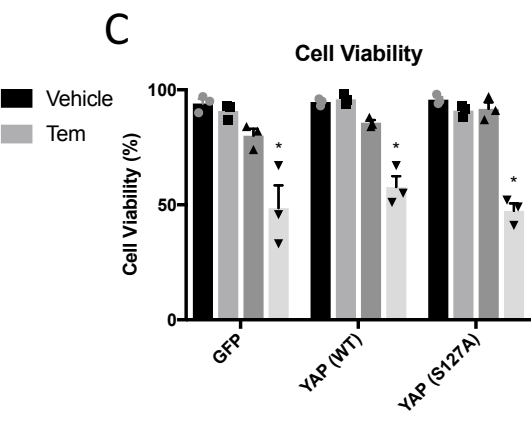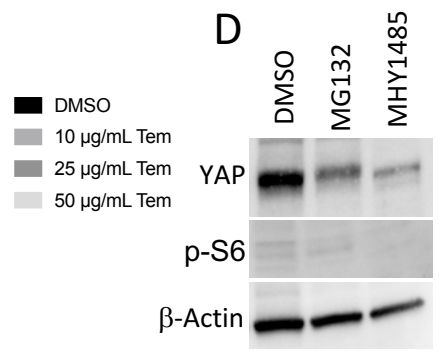

### YAP

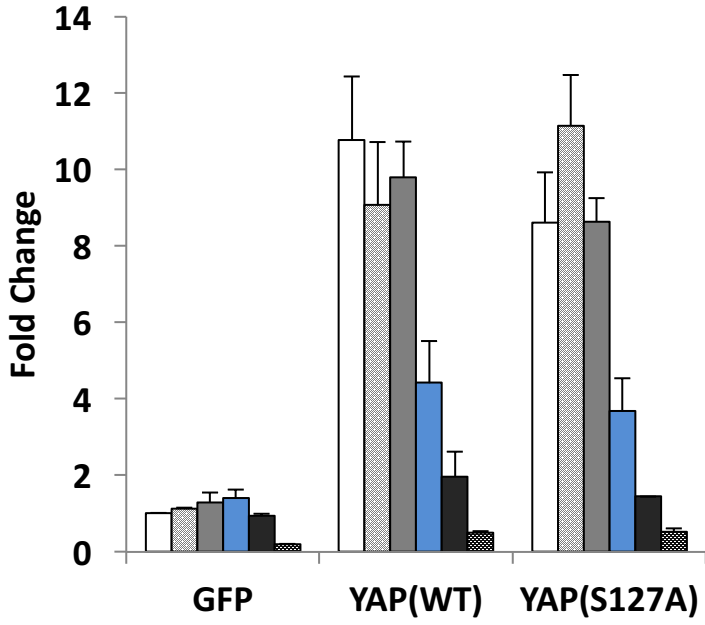

### JUB

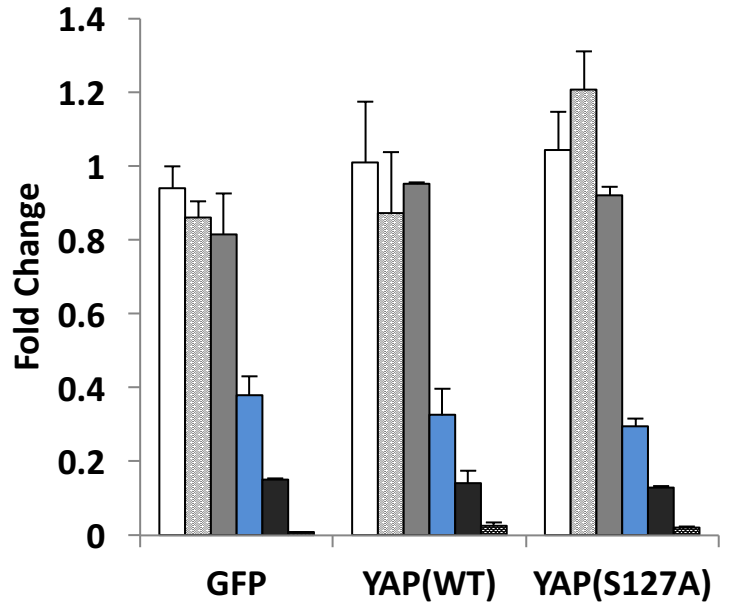

### AXL

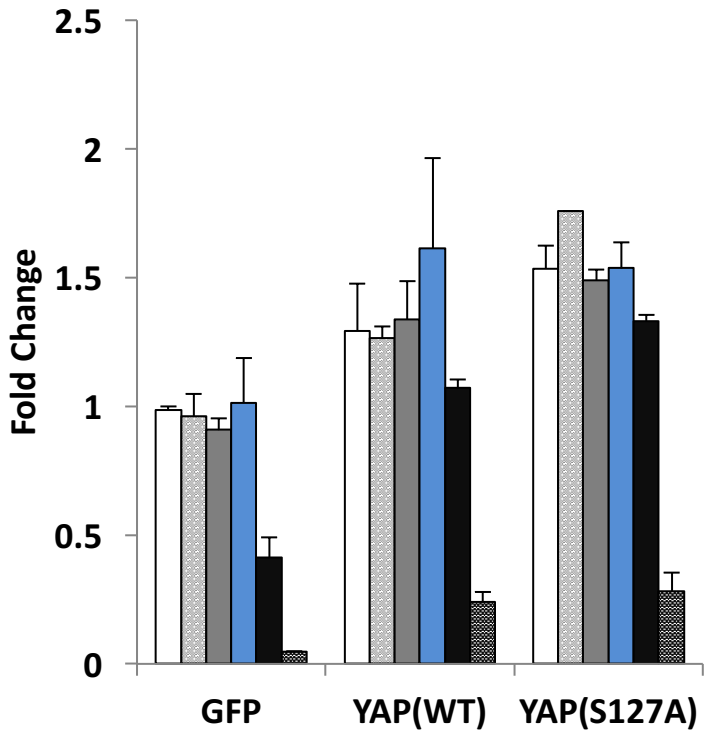

### CTGF

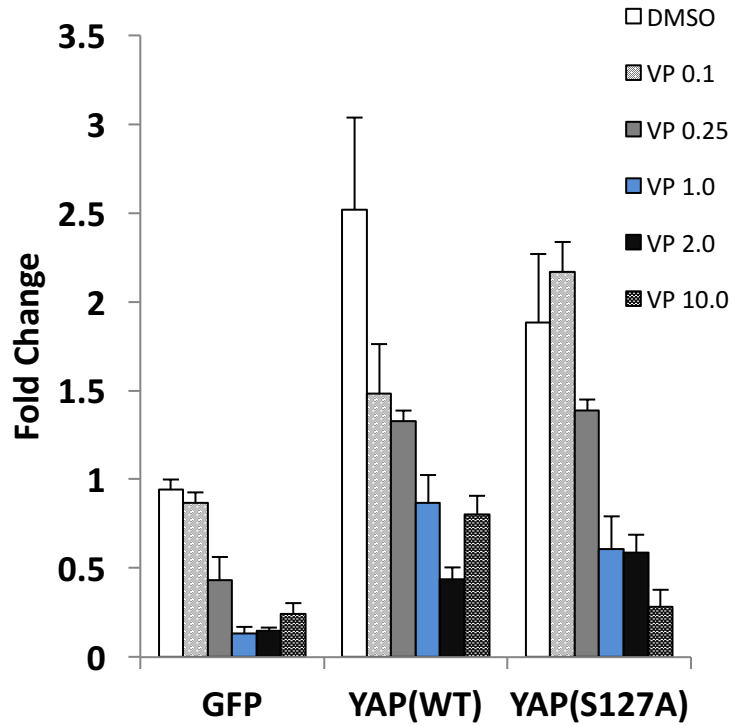

### YAP

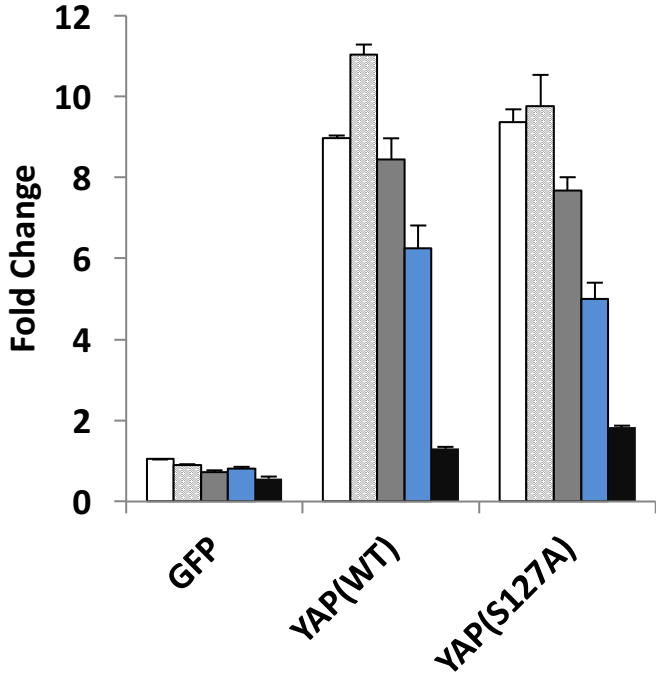

### JUB

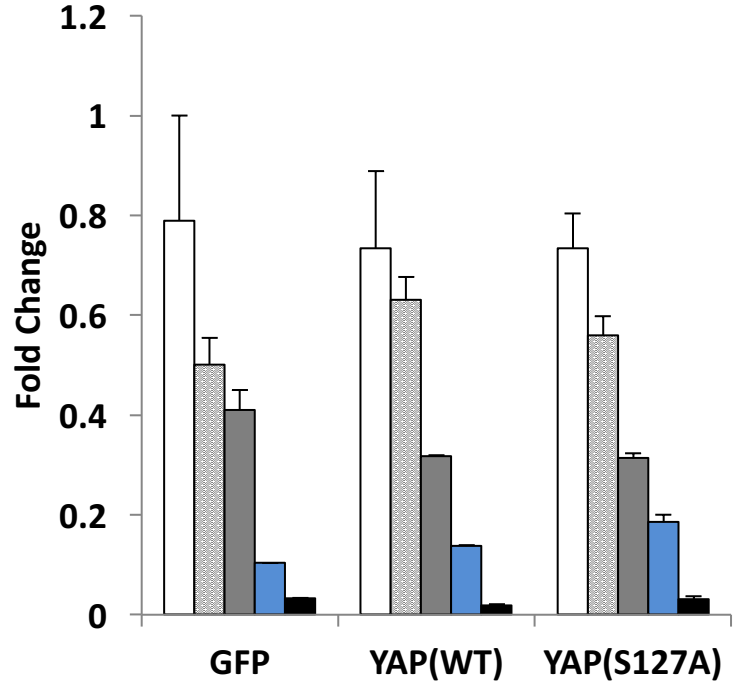

### AXL

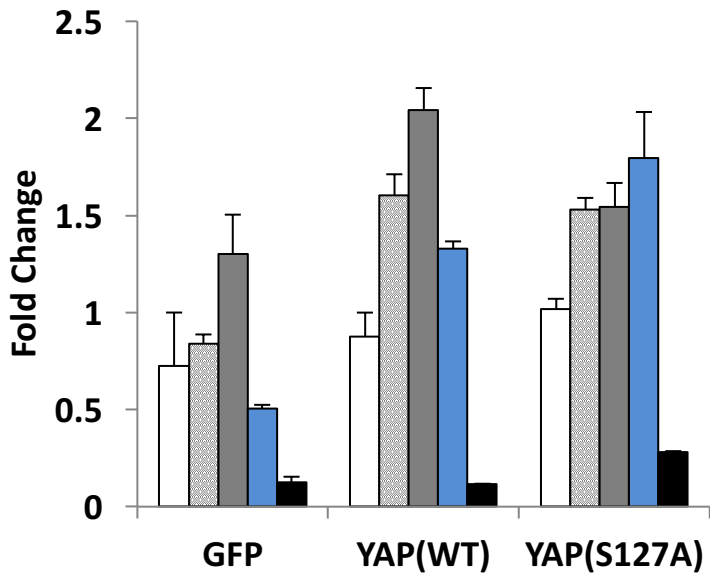

### CTGF

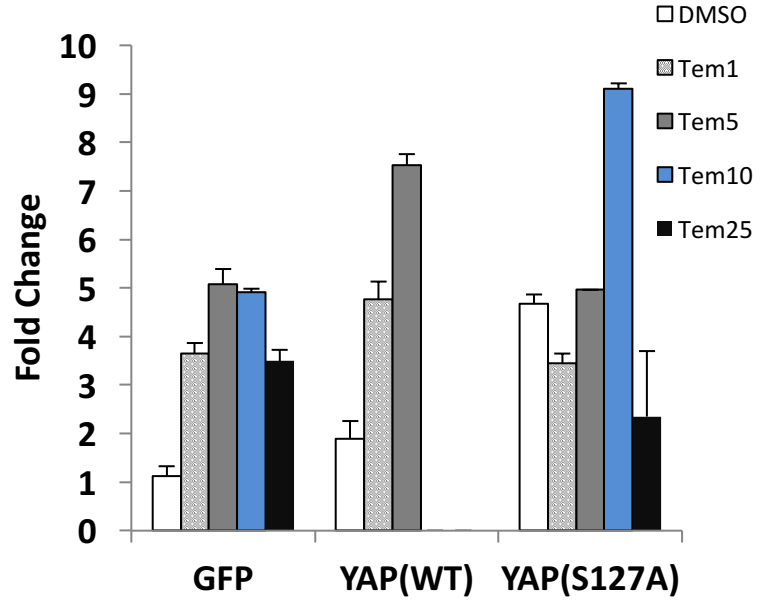

| Antibody         | Source              | Catalog #      | Host       | Dilution (WB) | Dilution (I.F.) | Antigen Retrieval |
|------------------|---------------------|----------------|------------|---------------|-----------------|-------------------|
| ABCA3            | 7 hills bioreagents | WMAB-17G524    | Mouse      |               | 1:200           |                   |
| ACTA2            | Sigma               | A5228          | Mouse      |               | 1:2000          |                   |
| Ajuba            | Cell Signaling      | 4897           | Rabbit     | 1:1000        | 1:100           | Citrate           |
| Ajuba            | Novus               | NBP 1-89570    | Rabbit     | 1:1000        | 1:200           | Tris-EDTA         |
| GAPDH            | Bethyl Laboratories | A300-641A      | Rabbit     | 1:10000       |                 |                   |
| KRT8             | DSHB                | TROMA-I        | Rat        |               | 1:200           |                   |
| MST1/2           | Bethyl              | A300-468A      | Rabbit     |               | 1:100           |                   |
| p-Pi3K (Y468)    | Cell Signaling      | 4228s          | Rabbit     | 1:1000        |                 |                   |
| p-PTEN (S380)    | Cell Signaling      | 9551s          | Rabbit     | 1:1000        |                 |                   |
| p-S6 (S235/S236) | Cell Signaling      | 2211s          | Rabbit     | 1:1500        | 1:200           |                   |
| p-S6K (T389)     | Cell Signaling      | 9250s          | Rabbit     |               | 1:100           |                   |
| p-YAP            | Cell Signaling      | 4911           | Rabbit     | 1:1000        |                 |                   |
| p-YAP            | 7 Hills Biologics   | N/A            | Guinea Pig |               | 1:200           |                   |
| Pan-KRT          | Millipore Sigma     | C2931          | Mouse      |               | 1:300           |                   |
| Pi3K             | Cell Signaling      | 4292s          | Rabbit     | 1:1000        |                 |                   |
| PTEN             | Cell Signaling      | 9552s          | Rabbit     | 1:1000        |                 |                   |
| S6               | Cell Signaling      | 2217s          | Rabbit     | 1:1000        |                 |                   |
| SCRIBBLE         | GeneTex             | GTX107692      | Rabbit     |               | 1:200           |                   |
| VANGLE           | Atlas               | HPA025235      | Rabbit     |               | 1:200           |                   |
| YAP              | Santa Cruz          | Sc-101199      | Mouse      |               | 1:100           | Citrate           |
| YAP              | Cell Signaling      | 4912           | Rabbit     | 1:1500        | 1:200           | Citrate           |
| YAP (1549)       | 7 hills bioreagents | Available soon | Rabbit     | 1:1500        | 1:200           | Citrate           |
| $\beta$ -Actin   | 7 hills bioreagents | LMAB-C4        | Mouse      | 1:10000       |                 |                   |

Table S1: List of antibodies used for immunofluorescence and western blots.

| Target        | Assay #       |
|---------------|---------------|
| <i>Sav1</i>   | Hs00560416_m1 |
| <i>Mst2</i>   | Hs00169491_m1 |
| <i>Ajuba</i>  | Hs01036974_m1 |
| <i>CDH1</i>   | Hs01023894_m1 |
| <i>Celsr1</i> | Hs00947712_m1 |
| <i>Scrib</i>  | Hs01034944_m1 |
| <i>Vangl1</i> | Hs01572998_m1 |
| YAP           | Hs00902712_g1 |
| CTGF          | Hs01026927_g1 |
| AXL           | Hs01064444_m1 |
| <i>Wnt7b</i>  | Hs00536497_m1 |
| <i>Plau</i>   | Hs01547055_g1 |

Table S2: List of Taqman primers used

| AXL PLISH probes                                       | CTGF PLISH probes                                      |
|--------------------------------------------------------|--------------------------------------------------------|
| L1:TAGCGCTAACAACTTACGTCGTTATGtcat<br>cgtcttcacagccac   | L1:TTAGTAGGCGAACTTACGTCGTTATGtgct<br>tctctagcctgcagga  |
| R1:acctcgtgcagatggcaatcTTATACGTCGAGTT<br>GAACGTCGTAACA | R1:tgaccatgcacagggcgctcTTATACGTCGAGT<br>TGAACATAAGTGCG |
| L2:TAGCGCTAACAACTTACGTCGTTATGtggg<br>acacgaaggctgatg   | L2:TTAGTAGGCGAACTTACGTCGTTATGtgct<br>cctaaagccacacctt  |
| R2:ccagcccaacatagccaggcTTATACGTCGAGT<br>TGAACGTCGTAACA | R2:ttctgctggtaccctcccacTTATACGTCGAGTTG<br>AACATAAGTGCG |
| L3:TAGCGCTAACAACTTACGTCGTTATGtcag<br>aagttgtgggctccc   | L3:TTAGTAGGCGAACTTACGTCGTTATGtcc<br>cctttgcaaacaatctg  |
| R3:ccatgggtgccaaactttccTTATACGTCGAGTTG<br>AACGTCGTAACA | R3:ctgccaaggacactgatgccTTATACGTCGAGT<br>TGAACATAAGTGCG |
| L4:TAGCGCTAACAACTTACGTCGTTATGtaag<br>aaggagaggggacccc  | L4:TTAGTAGGCGAACTTACGTCGTTATGag<br>gcttgagattttgggag   |
| R4:gaggaggaagcaatgatagcTTATACGTCGAGT<br>TGAACGTCGTAACA | R4:ccagaaagctcaaacttgatTTATACGTCGAGTT<br>GAACATAAGTGCG |
| L5:TAGCGCTAACAACTTACGTCGTTATGtgag<br>gtgggcagatcacttg  | L5:TTAGTAGGCGAACTTACGTCGTTATGaca<br>ggcaggtcagtgagcac  |
| R5:atctcagcactttgggaggcTTATACGTCGAGTTG<br>AACGTCGTAACA | R5:tcctagctgtcactggggctTTATACGTCGAGTT<br>GAACATAAGTGCG |

Table S3: PLISH probes targeting AXL and CTGF. Lowercase letters correspond to target sequence on respective gene of interest. Uppercase letters correspond to conserved sequence used to bind connecting bridges.
